# Supplementary material for: Theoretical, photophysical and biological investigations of an organic charge transfer compound 2-aminobenzimidazolium-2-oxyisoindolate-1,3-dione-2-hydroxyisoindoline-1,3-dione
Source: Royal Society of Chemistry journal article supplement (doi:10.1039/c6ra03574d), 2016-01-01
Supplement: c6ra03574d1.pdf [file c6ra03574d1.pdf]

**ELECTRONIC SUPPORTING INFORMATION**

**Theoretical, photophysical and biological investigations of an organic charge transfer  
compound 2-aminobenzimidazolium-2-oxyisoindolate-1,3-dione-  
2-hydroxyisoindoline-1,3-dione**

**D. Mahendiran<sup>a</sup>, G. Vinitha<sup>b</sup>, S. Shobana<sup>c</sup>, V. Viswanathan<sup>d</sup>, D. Velmurugan<sup>d</sup>,  
A. Kalilur Rahiman<sup>a\*</sup>**

*<sup>a</sup>Post-Graduate and Research Department of Chemistry, The New College (Autonomous),  
Chennai-600 014, India*

*<sup>b</sup>Division of Physics, School of Advanced Sciences, VIT University, Chennai-600 127, India*

*<sup>c</sup>Department of Bioinformatics, School of Bioengineering, SRM University,  
Kattankulathur 603 203, India*

*<sup>d</sup>CAS in Crystallography and Biophysics, University of Madras, Guindy Campus,  
Chennai-600 025, India*

---

**Table S1. Crystal data and structure refinement for ABOH**

|                                             |                                                                                                                                                                            |
|---------------------------------------------|----------------------------------------------------------------------------------------------------------------------------------------------------------------------------|
| Parameters                                  | ABOH                                                                                                                                                                       |
| Empirical formula                           | $C_{23}H_{17}N_5O_6$                                                                                                                                                       |
| Formula weight                              | 459.42                                                                                                                                                                     |
| Temperature (K)                             | 573(2)                                                                                                                                                                     |
| Wavelength (Å)                              | 0.71073                                                                                                                                                                    |
| Crystal system                              | Monoclinic                                                                                                                                                                 |
| Space group                                 | $P2_1/c$                                                                                                                                                                   |
| Unit cell dimensions                        | $a = 8.5032(5) \text{ \AA} \quad \alpha = 90^\circ$<br>$b = 12.9483(7) \text{ \AA} \quad \beta = 98.797(3)^\circ$<br>$c = 18.8575(11) \text{ \AA} \quad \gamma = 90^\circ$ |
| Volume (Å <sup>3</sup> )                    | 2051.8(2)                                                                                                                                                                  |
| Z, Calculated density (Mg/m <sup>-3</sup> ) | 4, 1.487                                                                                                                                                                   |
| F(000)                                      | 952                                                                                                                                                                        |
| Crystal size (mm)                           | 0.20 × 0.15 × 0.10                                                                                                                                                         |
| Theta range for data collection             | 1.92 to 27.42°                                                                                                                                                             |
| Limiting indices                            | $-10 \leq h \leq 11, -16 \leq k \leq 16, -24 \leq l \leq 24$                                                                                                               |
| Reflections collected/unique                | 31613/4522 [R(int) = 0.0381]                                                                                                                                               |
| Completeness to theta                       | 97.00%                                                                                                                                                                     |
| Max. and min. transmission                  | 0.9890 and 0.9782                                                                                                                                                          |
| Refinement method                           | Full-matrix least-squares on F <sup>2</sup>                                                                                                                                |
| Data/restraints/parameters                  | 4522/0/309                                                                                                                                                                 |
| Goodness-of-fit on F <sup>2</sup>           | 1.051                                                                                                                                                                      |
| Final R indices [I > 2σ(I)]                 | R1 = 0.0396, wR2 = 0.1016                                                                                                                                                  |
| R indices (all data)                        | R1 = 0.0575, wR2 = 0.1113                                                                                                                                                  |
| Largest diff. peak and hole                 | 0.223 and -0.170 e.Å <sup>-3</sup>                                                                                                                                         |

**Table S2. Selected bond lengths (Å) and bond angles (°) for ABOH**

| Bond       | Bond length (Å) | Bond             | Bond angle (°) |
|------------|-----------------|------------------|----------------|
| C(1)-O(1)  | 1.2049(2)       | O(1)-C(1)-N(1)   | 125.61(1)      |
| C(1)-N(1)  | 1.3831(2)       | O(1)-C(1)-C(2)   | 130.06(1)      |
| C(8)-O(3)  | 1.2017(1)       | N(1)-C(1)-C(2)   | 104.32(2)      |
| C(8)-N(1)  | 1.3895(1)       | O(3)-C(8)-N(1)   | 125.59(1)      |
| C(9)-O(4)  | 1.2133(1)       | O(3)-C(8)-C(7)   | 130.10(1)      |
| C(9)-N(2)  | 1.3795(1)       | N(1)-C(8)-C(7)   | 104.31(1)      |
| C(16)-O(6) | 1.2126(1)       | O(4)-C(9)-N(2)   | 125.37(1)      |
| C(16)-N(2) | 1.3834(1)       | O(4)-C(9)-C(10)  | 128.99(1)      |
| C(17)-N(5) | 1.3214(2)       | N(2)-C(9)-C(10)  | 105.64(1)      |
| C(17)-N(4) | 1.3321(2)       | O(6)-C(16)-N(2)  | 124.14(1)      |
| C(17)-N(3) | 1.3349(2)       | O(6)-C(16)-C(15) | 130.31(1)      |
| C(18)-N(3) | 1.3905(1)       | N(2)-C(16)-C(15) | 105.55(1)      |
| C(23)-N(4) | 1.3975(2)       | N(5)-C(17)-N(4)  | 124.54(1)      |
| N(1)-O(2)  | 1.3716(2)       | N(5)-C(17)-N(3)  | 126.22(1)      |
| N(2)-O(5)  | 1.3623(1)       | N(4)-C(17)-N(3)  | 109.23(1)      |
| –          | –               | C(19)-C(18)-N(3) | 131.75(1)      |
| –          | –               | C(23)-C(18)-N(3) | 106.72(1)      |
| –          | –               | C(22)-C(23)-N(4) | 132.32(1)      |
| –          | –               | C(18)-C(23)-N(4) | 105.96(1)      |
| –          | –               | O(2)-N(1)-C(1)   | 123.06(1)      |
| –          | –               | O(2)-N(1)-C(8)   | 122.43(1)      |
| –          | –               | C(1)-N(1)-C(8)   | 114.11(1)      |
| –          | –               | O(5)-N(2)-C(9)   | 124.18(1)      |
| –          | –               | O(5)-N(2)-C(16)  | 122.98(1)      |
| –          | –               | C(9)-N(2)-C(16)  | 112.82(1)      |
| –          | –               | C(17)-N(3)-C(18) | 108.93(1)      |
| –          | –               | C(17)-N(4)-C(23) | 109.15(1)      |

**Table S3. Calculated FT IR spectral band assignments of ABOH crystal**

| Infrared frequencies (cm <sup>-1</sup> ) | Assignments                                            |
|------------------------------------------|--------------------------------------------------------|
| 3449.46                                  | N-H asymmetric stretching vibration(-NH <sub>2</sub> ) |
| 3225.30                                  | N-H symmetric stretching vibration(-NH <sub>2</sub> )  |
| 3188.58                                  | N-H stretching vibration                               |
| 3042.16                                  | C-H stretching vibration                               |
| 1636.21                                  | C=O Stretching vibration                               |
| 1532.37                                  | N-H bending vibration                                  |
| 1188.89                                  | C-H in-plane bending vibration                         |
| 1053.09                                  | C-H out of plane bending vibration                     |
| 1013.15                                  | C-N stretching vibration                               |
| 893.33                                   | N-H wagging vibration                                  |

**Table S4. Experimental and calculated bond lengths (Å) and bond angles (°) of ABOH**

|            | Bond length (Å) |        |                  | Bond angle (°) |        |
|------------|-----------------|--------|------------------|----------------|--------|
|            | Experimental    | DFT    |                  | Experimental   | DFT    |
| C(1)-O(1)  | 1.2049(2)       | 1.2108 | O(1)-C(1)-N(1)   | 125.61(1)      | 126.96 |
| C(1)-N(1)  | 1.3831(2)       | 1.3923 | O(1)-C(1)-C(2)   | 130.06(1)      | 130.15 |
| C(8)-O(3)  | 1.2017(1)       | 1.2203 | N(1)-C(1)-C(2)   | 104.32(2)      | 104.72 |
| C(8)-N(1)  | 1.3895(1)       | 1.3869 | O(3)-C(8)-N(1)   | 125.59(1)      | 126.01 |
| C(9)-O(4)  | 1.2133(1)       | 1.2259 | O(3)-C(8)-C(7)   | 130.10(1)      | 129.95 |
| C(9)-N(2)  | 1.3795(1)       | 1.3743 | N(1)-C(8)-C(7)   | 104.31(1)      | 104.03 |
| C(16)-O(6) | 1.2126(1)       | 1.2086 | O(4)-C(9)-N(2)   | 125.37(1)      | 126.06 |
| C(16)-N(2) | 1.3834(1)       | 1.4008 | O(4)-C(9)-C(10)  | 128.99(1)      | 129.95 |
| C(17)-N(5) | 1.3214(2)       | 1.3233 | N(2)-C(9)-C(10)  | 105.64(1)      | 105.17 |
| C(17)-N(4) | 1.3321(2)       | 1.3628 | O(6)-C(16)-N(2)  | 124.14(1)      | 122.32 |
| C(17)-N(3) | 1.3349(2)       | 1.3423 | O(6)-C(16)-C(15) | 130.31(1)      | 132.94 |
| C(18)-N(3) | 1.3905(1)       | 1.3938 | N(2)-C(16)-C(15) | 105.55(1)      | 104.77 |
| C(23)-N(4) | 1.3975(2)       | 1.3971 | N(5)-C(17)-N(4)  | 124.54(1)      | 122.70 |
| N(1)-O(2)  | 1.3716(2)       | 1.3793 | N(5)-C(17)-N(3)  | 126.22(1)      | 125.17 |
| N(2)-O(5)  | 1.3623(1)       | 1.3643 | N(4)-C(17)-N(3)  | 109.23(1)      | 112.07 |
| –          | –               | –      | C(19)-C(18)-N(3) | 131.75(1)      | 130.25 |
| –          | –               | –      | C(23)-C(18)-N(3) | 106.72(1)      | 106.02 |
| –          | –               | –      | C(22)-C(23)-N(4) | 132.32(1)      | 132.61 |
| –          | –               | –      | C(18)-C(23)-N(4) | 105.96(1)      | 104.72 |
| –          | –               | –      | O(2)-N(1)-C(1)   | 123.06(1)      | 122.88 |
| –          | –               | –      | O(2)-N(1)-C(8)   | 122.43(1)      | 122.84 |
| –          | –               | –      | C(1)-N(1)-C(8)   | 114.11(1)      | 115.14 |
| –          | –               | –      | O(5)-N(2)-C(9)   | 124.18(1)      | 124.12 |
| –          | –               | –      | O(5)-N(2)-C(16)  | 122.98(1)      | 120.72 |
| –          | –               | –      | C(9)-N(2)-C(16)  | 112.82(1)      | 113.78 |
| –          | –               | –      | C(17)-N(3)-C(18) | 108.93(1)      | 107.46 |
| –          | –               | –      | C(17)-N(4)-C(23) | 109.15(1)      | 106.00 |

**Table S5. The energy of experimental absorption bands and the electronic transitions calculated with the TD-DFT method for ABOH**

| $E$ (eV) | $F$    | Wavelength $\lambda$ (nm) |       | Major contribution                      |
|----------|--------|---------------------------|-------|-----------------------------------------|
|          |        | (Cal)                     | (Exp) |                                         |
| 2.36     | 0.0027 | 355                       | –     | HOMO→LUMO (100%)                        |
| 2.89     | 0.0002 | 342                       | 345   | HOMO→LUMO+1 (100%)<br>HOMO-1→LUMO (99%) |
| 2.92     | 0.0007 | 275                       | 271   | HOMO-6→LUMO (61%)<br>HOMO-3→LUMO (30%)  |

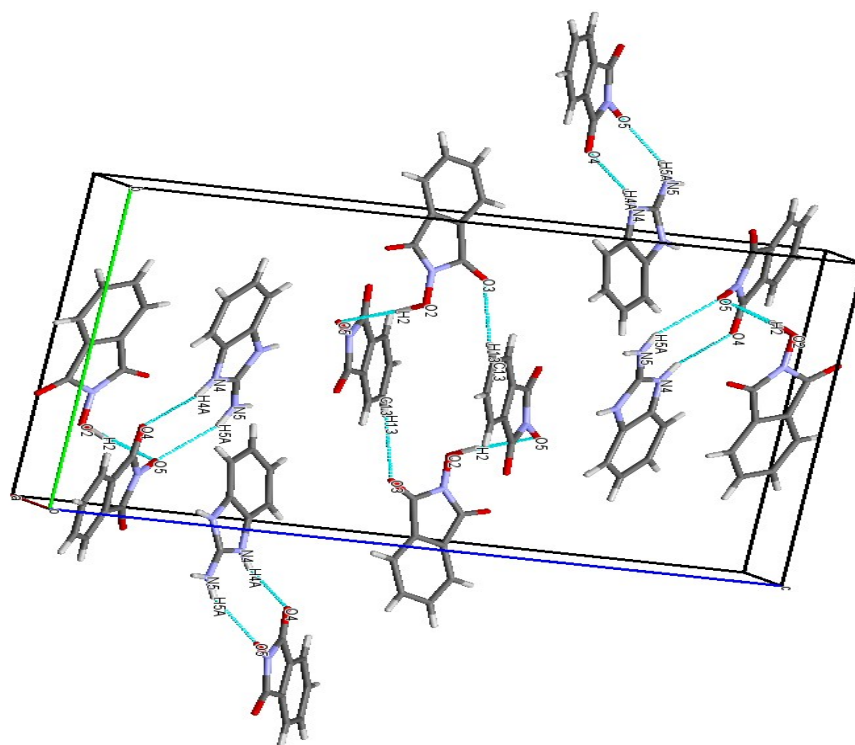

**Fig. S1** Packing diagram of ABOH view down 'b' axis.

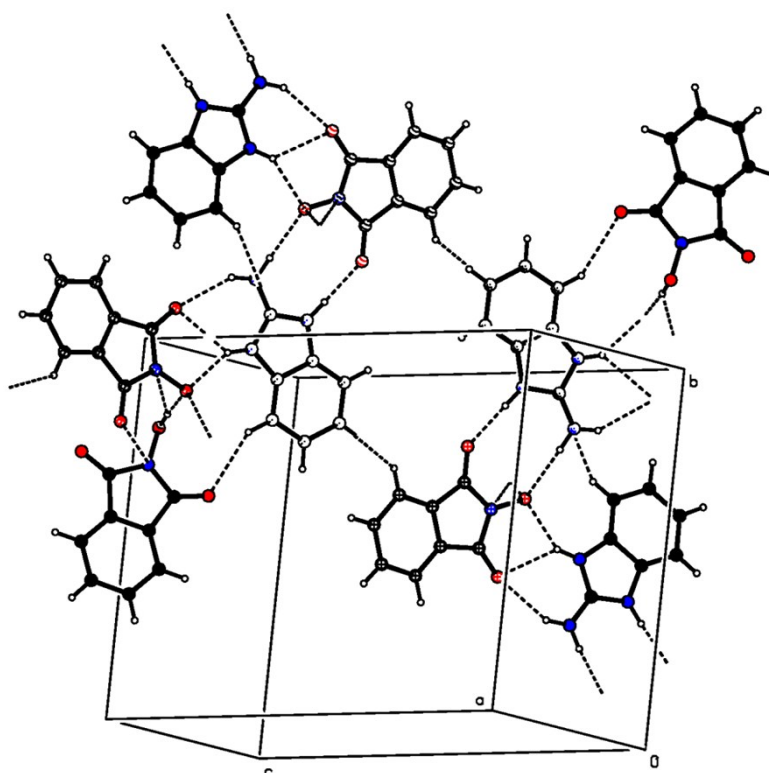

**Fig. S2** Packing diagram of the compound ABOH running along 'bc' plane.

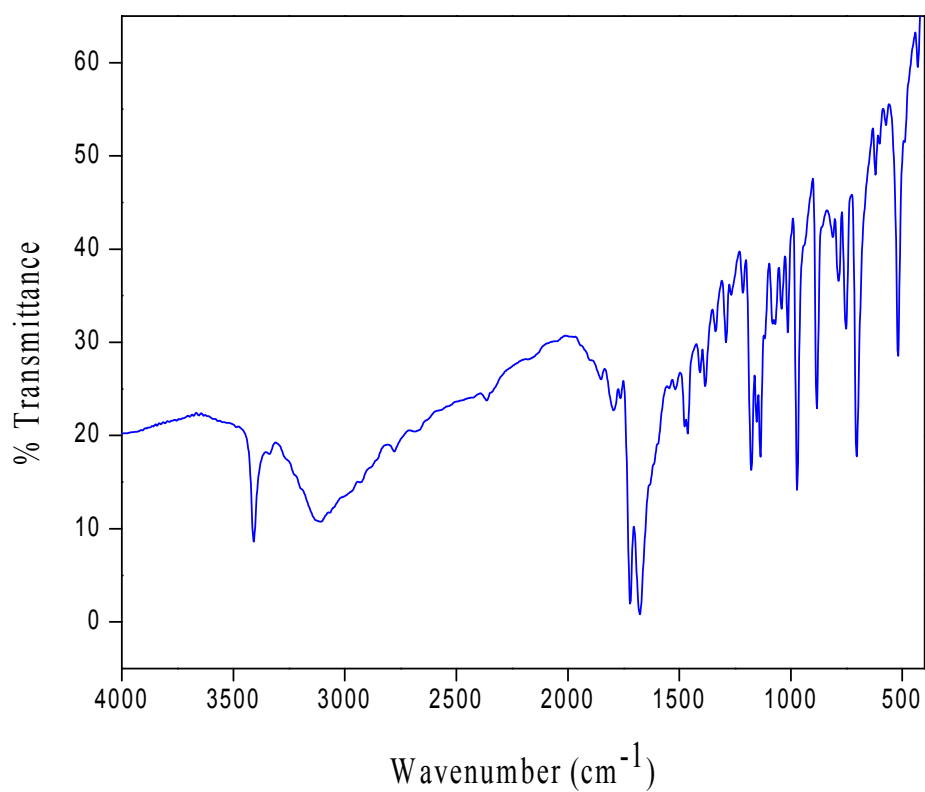

**Fig. S3** FT IR spectrum of ABOH crystal.

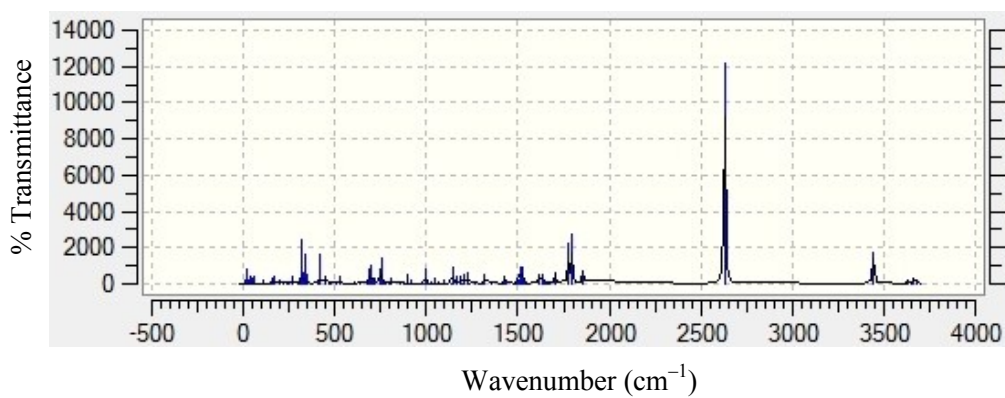

**Fig. S4** Calculated FT IR spectrum of ABOH crystal.



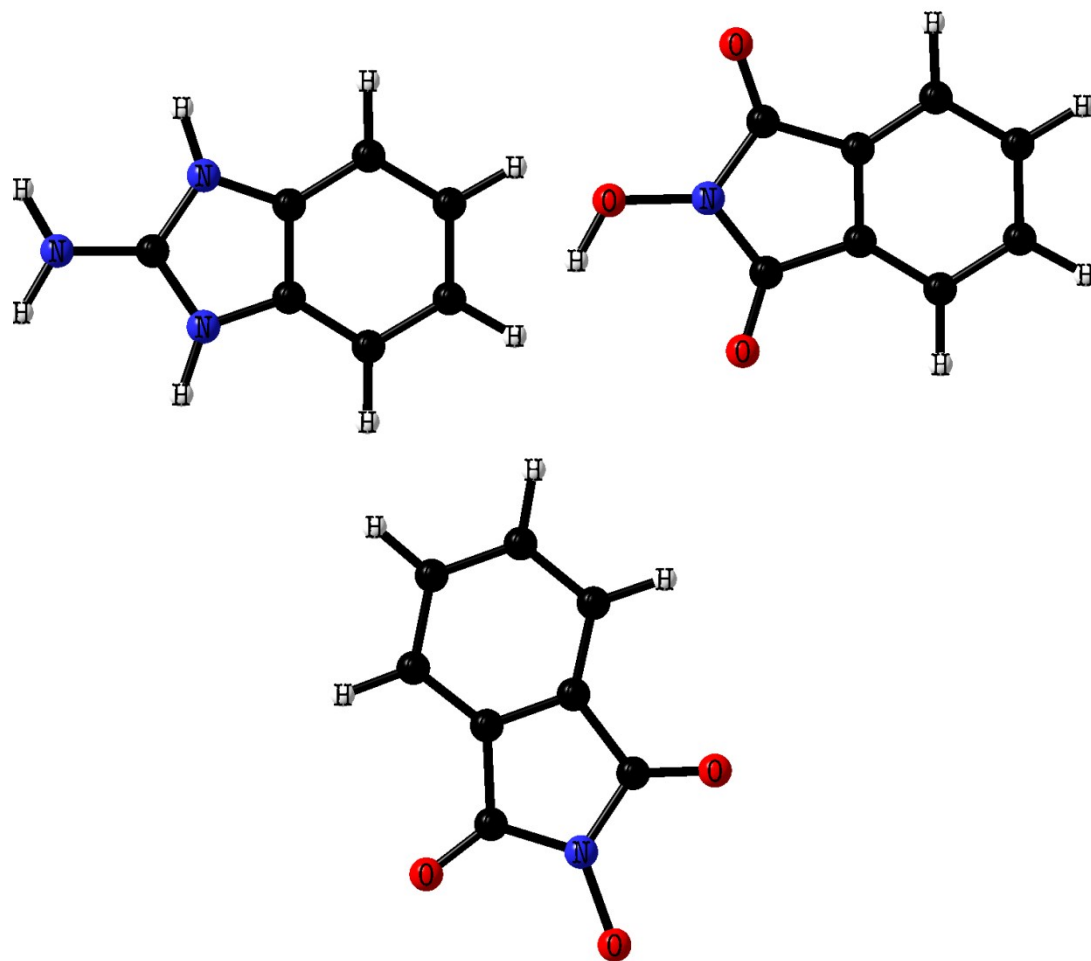

Fig. S5 Optimized geometry of ABOH crystal.

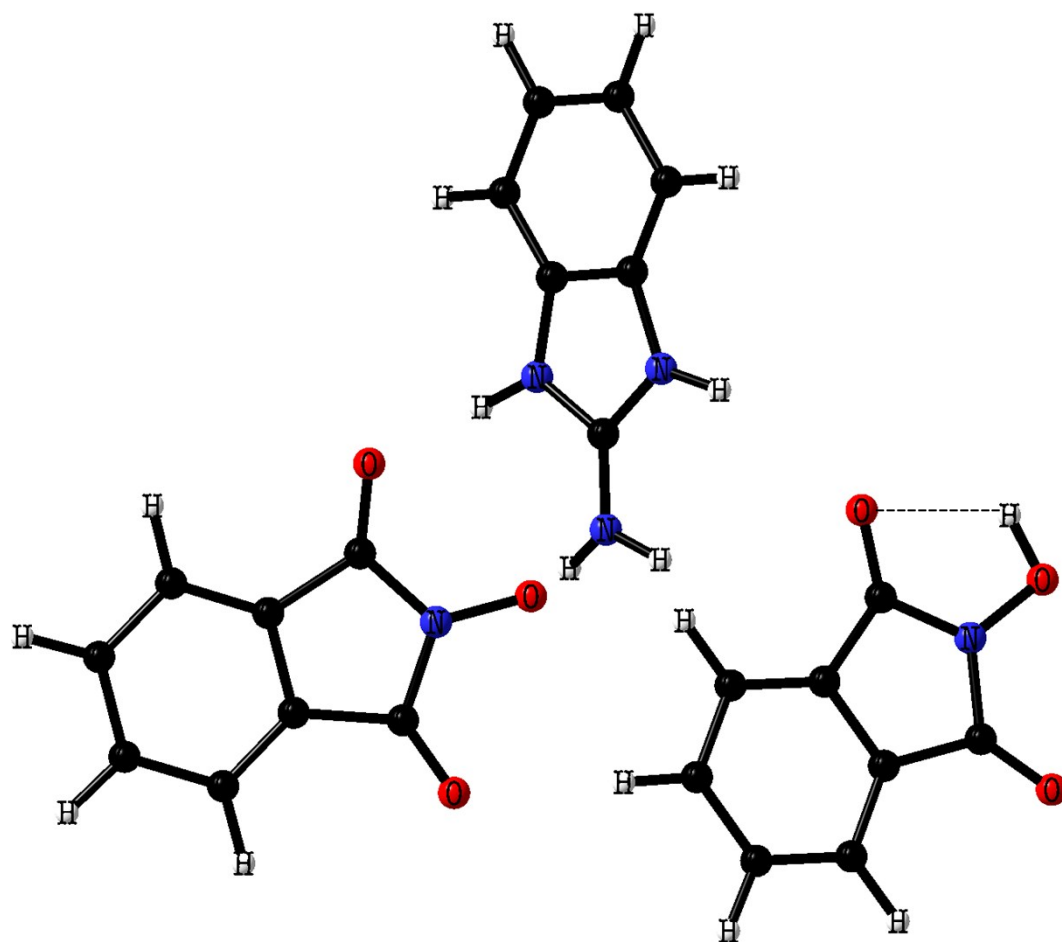

**Fig. S6** Intramolecular interaction of ABOH crystal.

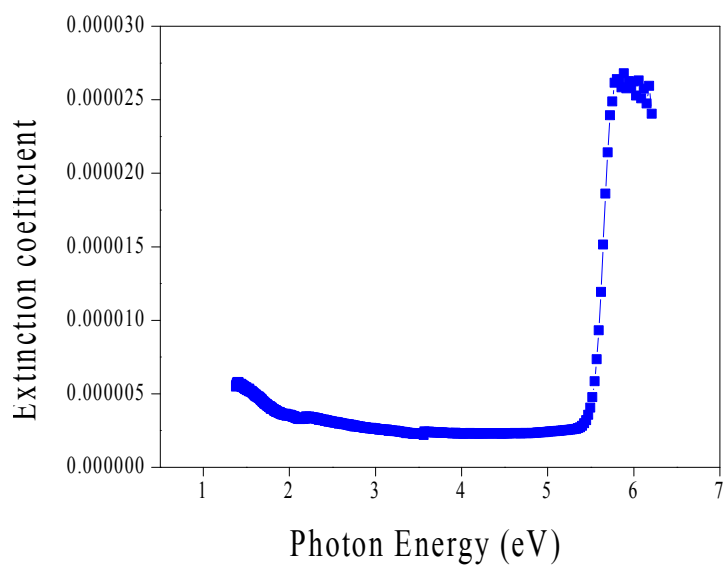

**Fig. S7** Plot of photon energy vs. extinction coefficient of ABOH crystal.

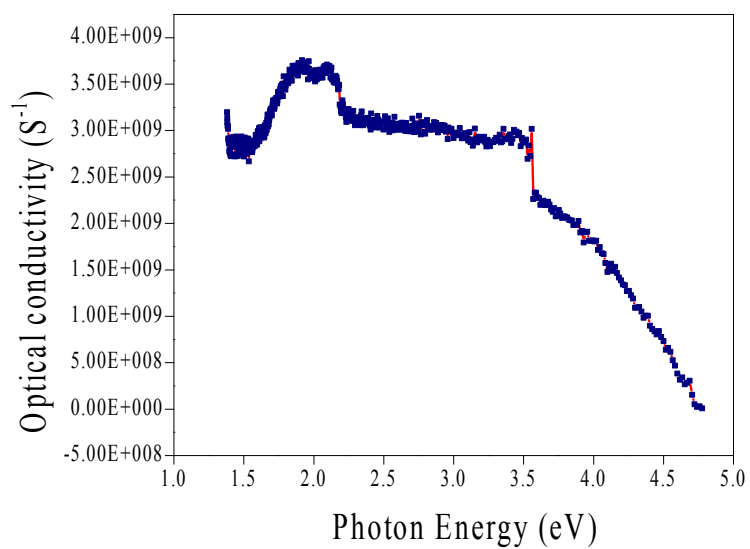

**Fig. S8** Plot of photon energy vs. optical conductivity of ABOH crystal.

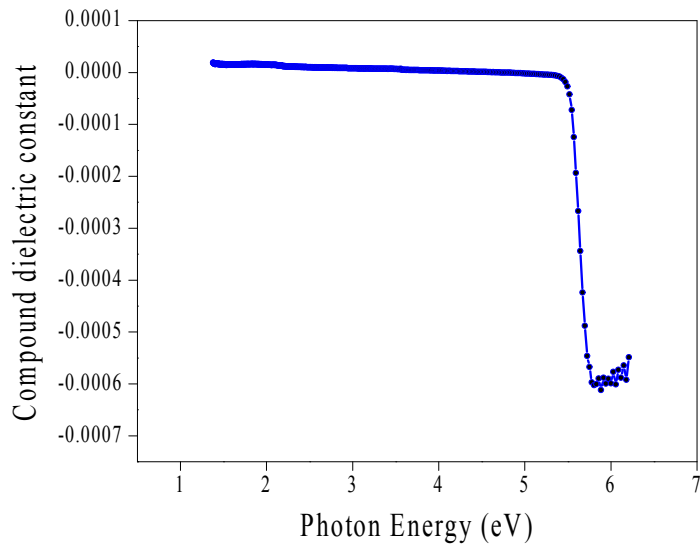

**Fig. S9** Plot of photon energy vs. compound dielectric constant of ABOH crystal.

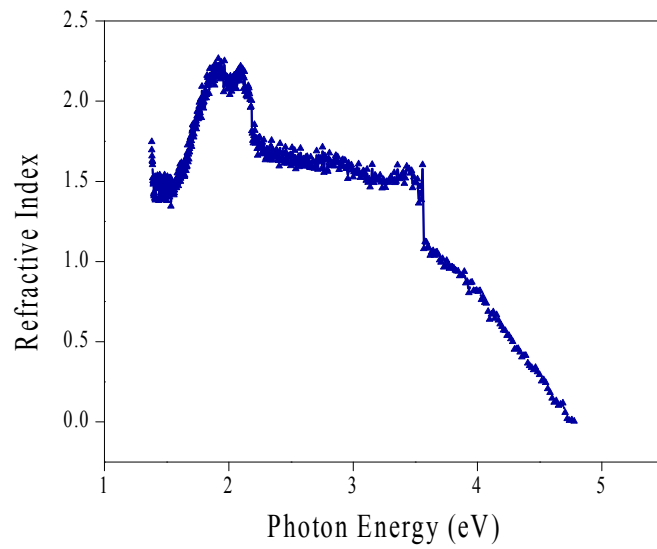

**Fig. S10** Plot of photon energy vs. refractive index of ABOH crystal.

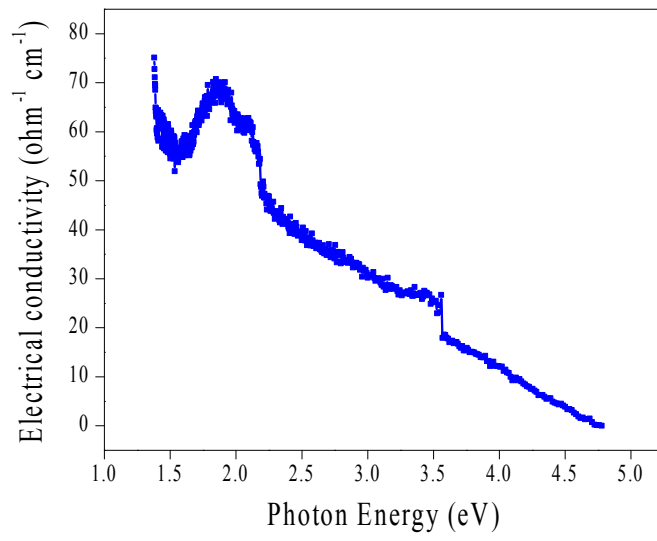

**Fig. S11** Plot of photon energy vs. electrical conductivity of ABOH crystal.

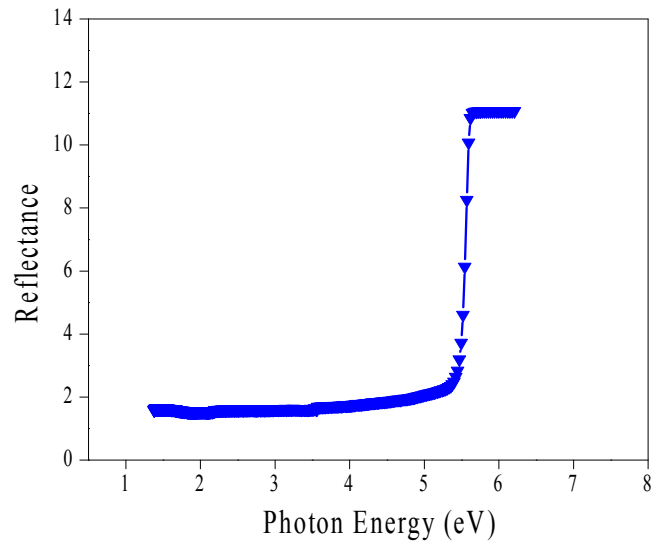

**Fig. S12** Plot of photon energy vs. reflectance of ABOH crystal.

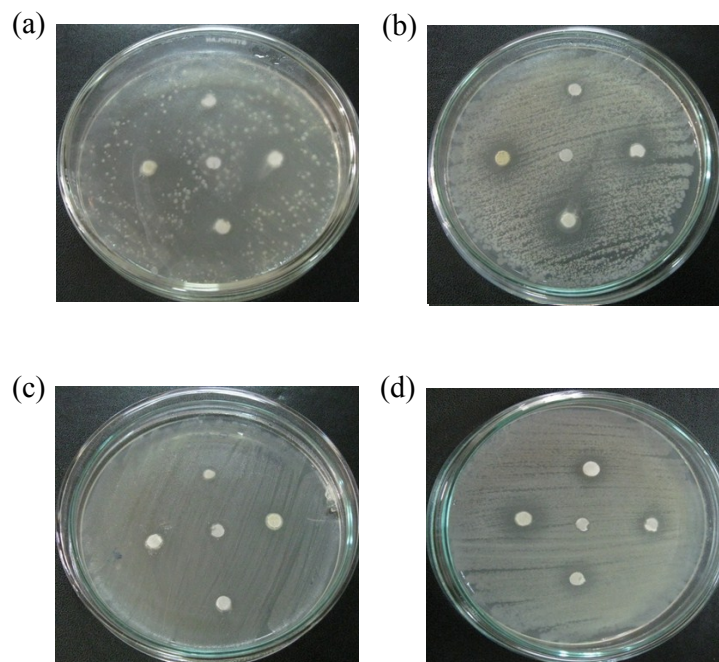

**Fig. S13** Antibacterial activity of ABOH against *E. coli* (a), *P. aeruginosa* (b), *K. pneumoniae* (c) and *S. aureus* (d).
